# Biological Responses of the Coral *Montastraea annularis* to the Removal of Filamentous Turf Algae

Neidy P. Cetz-Navarro<sup>1</sup>, Julio Espinoza-Avalos<sup>1\*</sup>, Héctor A. Hernández-Arana<sup>1</sup>, Juan P. Carricart-Ganivet<sup>2</sup>

<sup>1</sup> El Colegio de la Frontera Sur, Chetumal, Quintana Roo, México, <sup>2</sup> Unidad Académica de Sistemas Arrecifales, Instituto de Ciencias del Mar y Limnología, Universidad Nacional Autónoma de México, Puerto Morelos, Quintana Roo, México

## Abstract

Coral reef degradation increases coral interactions with filamentous turf algae (FTA) and macroalgae, which may result in chronic stress for the corals. We evaluated the effects of short (2.5 month) and long (10 month) periods of FTA removal on tissue thickness (TT), zooxanthellae density (ZD), mitotic index (MI), and concentration of chlorophyll *a* (Chl *a*) in *Montastraea annularis* at the beginning and end of gametogenesis. Ramets (individual lobes within a colony) consistently surrounded by FTA and ramets surrounded by crustose coralline algae (CCA) were used as controls. FTA removal reduced coral stress, indicated by increased TT and ZD and lower MI. The measured effects were similar in magnitude for the short and long periods of algal removal. Ramets were more stressed at the end of gametogenesis compared with the beginning, with lower ZD and Chl *a* cm<sup>-2</sup>, and higher MI. However, it was not possible to distinguish the stress caused by the presence of FTA from that caused by seasonal changes in seawater temperature. Ramets surrounded by CCA showed less stress in comparison with ramets surrounded by FTA: with higher TT, Chl *a* cm<sup>-2</sup> and ZD, and lower MI values. Coral responses indicated that ramets with FTA suffered the most deleterious effects and contrasted with those measured in ramets surrounded by CCA. According to published studies and our observations, there could be at least six mechanisms associated to FTA in the stress caused to *M. annularis* by FTA. Owing to the high cover of FTA (in contrast to macroalgae and CCA) in the Caribbean, the chronic stress, the overgrowth and mortality that this functional algal group can cause on *M. annularis* species complex, a further decline of this important reef-building coral in the Caribbean is expected.

**Citation:** Cetz-Navarro NP, Espinoza-Avalos J, Hernández-Arana HA, Carricart-Ganivet JP (2013) Biological Responses of the Coral *Montastraea annularis* to the Removal of Filamentous Turf Algae. PLoS ONE 8(1): e54810. doi:10.1371/journal.pone.0054810

**Editor:** Sebastian C. A. Ferse, Leibniz Center for Tropical Marine Ecology, Germany

**Received:** April 19, 2012; **Accepted:** December 17, 2012; **Published:** January 23, 2013

**Copyright:** © 2013 Cetz-Navarro et al. This is an open-access article distributed under the terms of the Creative Commons Attribution License, which permits unrestricted use, distribution, and reproduction in any medium, provided the original author and source are credited.

**Funding:** Funding for this study was provided by PADI Foundation (Req. number 64, 2009; NPCN) and federal funds given to ECOSUR (JEA). NPCN was supported by the Consejo Nacional de Ciencia y Tecnología (CONACYT) through Graduate Research Scholarship (32985). The funders had no role in study design, data collection and analysis, decision to publish, or preparation of the manuscript.

**Competing Interests:** The authors have declared that no competing interests exist.

\* E-mail: jespino@ecosur.mx

## Introduction

Coral reef degradation can involve a dominance shift from live coral colonies to dead corals overgrown by algae [1,2]. Coral reefs in the Caribbean basin are among the most severely degraded in the world, with a remarkable decrease in coral cover [3–5]. An increase in algal cover on degraded coral reefs has led to a high frequency and longer duration of interactions between corals and algae [2,6,7]. Besides, positive and negative interactions of algal functional groups, such as macroalgae, filamentous turf algae (FTA) and crustose coralline algae (CCA), with corals have been reported [8–10]. However, macroalgae and FTA are generally assumed to have negative effects [11–14], while CCA is thought to have minimal or no detrimental effects on corals [12–15].

FTA, which may be mixed with macroalgae, can directly or indirectly provoke coral stress. Symptoms of coral stress caused by the presence of those algae include hypoxia, tissue disruption, altered pigmentation [13,16,17], bleaching [13], increment in thickness of the diffusive boundary layer [18], a major shift in the bacterial communities in the algae-coral tissue interaction (including pathogenic microbes) [17], reductions in fecundity, photosynthetic performance and growth rate [13,19–23], and mortality [16,24]. Similarly, reductions in tissue thickness, zooxanthellae density and chlorophyll *a* concentrations were

identified as symptoms of coral stress for the coral *Montastraea faveolata* in competition for space with FTA [24]. Additionally, the mitotic index of zooxanthellae increases when corals face different stressful conditions [25,26]. In contrast, ramets of *Montastraea annularis* bordered by CCA showed no deleterious responses. Instead, they had a slightly higher photochemical efficiency, higher concentrations of dissolved oxygen (hyperoxia), and an increase in the diversity of coral-associated bacterial communities, including non-pathogenic microbes [17,23].

In addition to the study of effects on corals due to the presence of algae, another approach has been to investigate the responses of corals to the removal of algae. Studies involving the removal of algae have separately evaluated coral responses over relatively short (e.g., 10–12 day to 2–3 month) [17,21,27] and long (e.g., several months to years) [28–30] periods. However, a comparison of responses to the removal of algae at different time scales has not been carried out for a coral species.

*Montastraea annularis*, one of the most important reef-building coral species in the Caribbean [31,32], is a hermaphrodite species with an annual reproductive cycle that begins in May and ends in August–September. The formation of gametes is asynchronous (i.e., formation of the female gametes begins in May and the formation of male gametes begins in June), while their release occurs synchronously in summer [33]. The formation of gametes is

a fundamental process in the life history of corals, and there is evidence of a trade-off between reproduction and maintenance [34]. Thus, corals can divert their energy into reproduction instead of repairing injuries [35] or in other cases energy is shifted from reproduction to wound healing, with maintenance apparently limiting reproduction [36]. In addition, corals exhibit different responses depending on the state of the gametogenesis. For example, during fragmentation, corals with female gametes forming in the late reproductive state continued developing, while those in the early vitellogenic stage were resorbed [37]. A question arises whether at the end of the gametogenesis *M. annularis* diverts more energy to reproduction instead of competition for space with FTA, resulting in a more stressed coral.

In the Caribbean, the tissue of *M. annularis* is frequently surrounded and overgrown by FTA [38–40], a functional algal group of dense, multi-species assemblages of filamentous algae and cyanobacteria that grows faster and occupies available space faster than macroalgae [23,24]. FTA, in combination with sediments, are considered a source of stress for corals when both are in contact [24,41].

We evaluated the effects of FTA removal on *M. annularis* stress by measuring tissue thickness, zooxanthellae density, mitotic index and chlorophyll *a* concentrations over relatively short (2.5 months) and long (7 and 10 months) periods of time, and at the beginning and end of coral gametogenesis. Unmanipulated ramets that were permanently surrounded by mixed FTA or CCA (Rhodophyta, Corallinaceae) were used as experimental controls. Our working hypotheses were that, in comparison to the control ramets surrounded by FTA:

- The removal of FTA would reduce coral stress.
- The stress reduction would be larger with long versus short periods of FTA removal; and
- Ramets with FTA removal and the controls with CCA in their periphery would have lower stress.
- Moreover, coral tissue stress would be greater at the end than the beginning of the gametogenesis.

## Materials and Methods

### Study Site

The experimental study was performed at Xahuayxol (18° 30' 11.9" N, 87° 45' 24.8" W), located in the southern part of Quintana Roo in the Mexican Caribbean. The study site is close to the breaker zone in a reef lagoon at a depth of about 1.5 m. Two distinct forms of coral-algae interaction were observed at the study site: ramets (single lobes of a colony or genet, see [42]) of *M. annularis* surrounded by FTA at the periphery of their base (Figure 1A) and ramets surrounded by CCA (Figure 1B). The second type of interaction was likely facilitated by a high abundance of the black sea urchin *Diadema antillarum*, which has also been reported in other Mexican Caribbean reefs [43]. Mats of FTA (~8 mm in height), with more than 50 intermixed species, predominantly consisted of creeping Rhodophyta but also included Cyanobacteria, Chlorophyta and Phaeophyceae species. Abundant sediment grains less than 0.3 mm in diameter were trapped within the mats. Conspicuous species in the mats of FTA were *Polysiphonia scopulorum* v. *villum*, *Lophosiphonia cristata*, *Herposiphonia bipinnata* (Rhodomelaceae), *Parviphycus trimatensis* (Gelidiellaceae), *Centroceras clavulatum*, *Ceramium* spp. (Ceramiales), *Anotrichium tenue* (Wrangeliaceae), *Padina* sp. (*Dictyosphaera* stage; Dictyotaceae), *Bryobesia johannae* (Cladophoraceae), *Lyngbya* spp. (Oscillatoriaceae) and *Dichothrix* spp. (Rivulariaceae).

### Experimental Design

Removal of FTA from experimental ramets of *M. annularis* was performed for 2.5 (with fortnightly algal removal) and 7–10 months (with monthly algal removal from October to December 2009 and fortnightly removal from January to August 2010) to evaluate the effects of short- and long-term algae removal on the coral at the beginning (May 25, 2010) and end (August 24, 2010) of gametogenesis (Figure 2).

A 2–3 cm wide belt of FTA around the periphery of the coral tissue was manually removed (Figure 1C) using a small wire brush (about 1 cm wide) and a knife, beginning on October 26, 2009 (month 0) and ending on August 24, 2010 (month 10; Figure 2). The first experimental treatment (T1) represented long-term algal removal, which ended on May 25, 2010 (T1M, 7 months of removal; *n* = 7) and August 24, 2010 (T1A, 10 months of removal; *n* = 7) to evaluate the coral responses to algal elimination at the beginning and the end of the gametogenesis cycle of *M. annularis*, respectively (Figure 2). The short-term algal removal (2.5 months, T2) evaluated coral conditions at the beginning and end of the gametogenesis cycle and was performed from March 2010 to May 2010 (T2M; *n* = 7) and June 2010 to August 2010 (T2A; *n* = 7), respectively (Figure 2). The last two treatments were controls: non-manipulated ramets surrounded by FTA (T3) and CCA (T4) collected in May (T3M (*n* = 7) and T4M (*n* = 7)) and August 2010 (T3A (*n* = 7) and T4A (*n* = 7)) (Figure 2). In total, we collected 56 ramets (*n* = 7 ramets per treatment per date) from several colonies. As part of the experimental design, 112 ramets were tagged at the beginning of the study as a precaution in case of loss or injury of ramets due to experimental manipulation or natural disturbances. For each treatment, the ramets were identified using four different tags that were easily recognizable in the field with plastic cable ties fastened at the base of the ramets and stainless steel wire hitched to the tags (Figures 1A–1C). None of the tags or wires was in contact with the coral tissue. Control ramets were tagged in order to verify that the coral contact with FTA and CCA persisted throughout the experiments.

Because sedimentation alone is a stress factor for corals [13,44,45] and corals stressed by sedimentation may have a lower capacity to tolerate other stressors [46], such as FTA [13], we attempted to separate the stress due to FTA and sediments on *M. annularis* (Figure 1D). We included a treatment group that consisted of ramets subjected to the removal of sediment from the FTA (Figure 1E) by using pressure air with a blowgun attached to a dive tank. This treatment was not feasible because of the high rate of sedimentation that occurred at the study site. After removal, the sediments replenished within the FTA mat in 1–3 days. As a result, the required frequency of sediment removal was beyond our capabilities and was not pursued.

To evaluate the effects of short- and long-term algal removal on *M. annularis* at the beginning and the end of gametogenesis, we measured the tissue thickness (TT), zooxanthellae density (ZD), mitotic index (MI), chlorophyll *a* (Chl *a*) zooxanthellae<sup>−1</sup> (Chl *a* zoox<sup>−1</sup>) and Chl *a* cm<sup>−2</sup>. Each experimental ramet was chiseled underwater and fragmented into one-half and two-quarter sections on the collection dates. The half ramet was used to evaluate the TT from the center. One-quarter of the ramet was used to obtain the blastate and to determine the ZD, MI, Chl *a* zoox<sup>−1</sup> and Chl *a* cm<sup>−2</sup>, and the other quarter was used for fecundity evaluations that will be reported elsewhere. The collected fragments were deposited in labeled dark plastic bags filled with seawater and placed in coolers for protection from the sun and temperature changes during transport to the laboratory. The biological parameters from the *M. annularis* fragments were measured using the methods described by Quan-Young and Espinoza-Avalos [24].



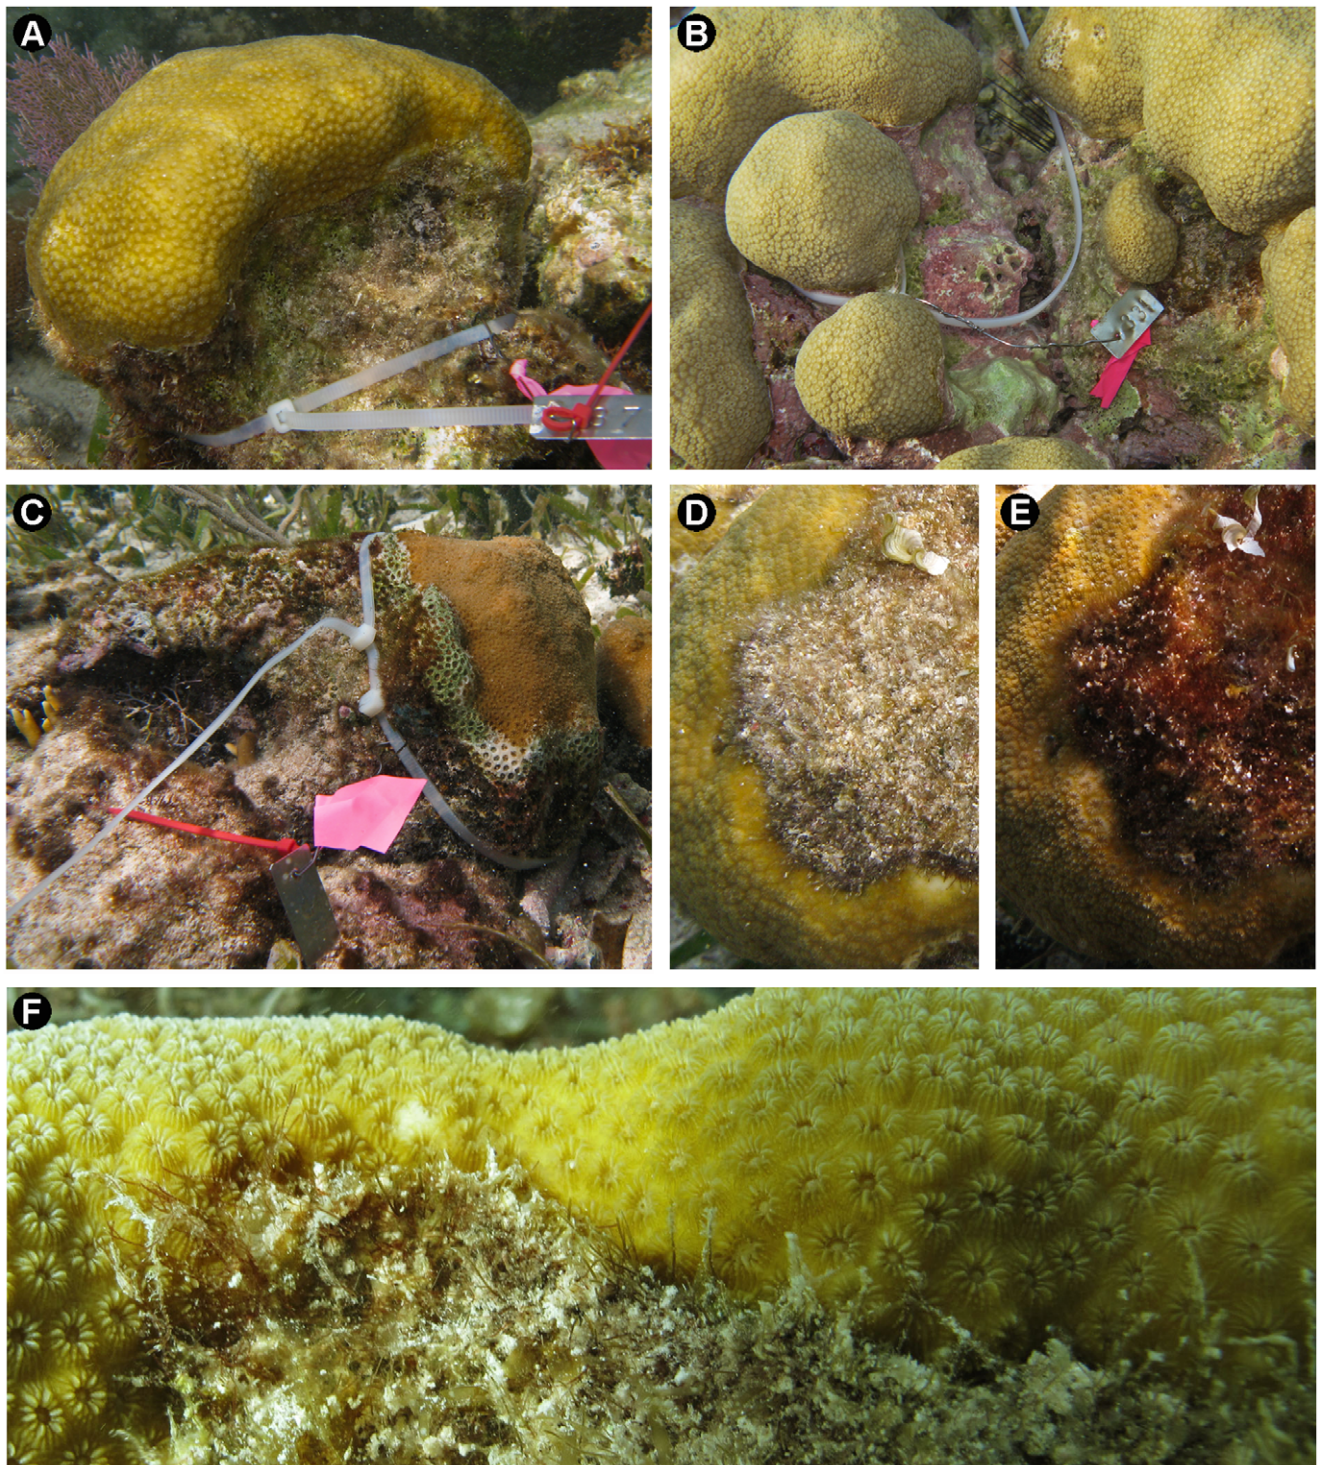

**Figure 1. *Montastraea annularis* with and without surrounding algae, and algal mat without sediment.** A) *M. annularis* ramet bordered by filamentous turf algae, B) *M. annularis* ramets bordered by crustose coralline algae, C) *M. annularis* ramet following the removal of filamentous turf algae, D) *M. annularis* ramet surrounded by filamentous turf algae with sediment trapped in the algal mat, E) ramet from Figure 1D following the removal of sediment from the algal mat using pressured air, and F) magnified view of the periphery of *M. annularis* being overgrown by filamentous turf algae through projections of prostrated axes. Photo credits: A–E by H Bahena-Basave and F by J Espinoza-Avalos.  
doi:10.1371/journal.pone.0054810.g001

The permit to collect the samples was provided by the Secretaría de Agricultura, Ganadería, Desarrollo Rural, Pesca y Alimentación (SAGARPA; permit number DGOPA.10745.121009.3629).

### Data Analyses

The biological parameter data from *M. annularis* were subjected to Kolmogorov-Smirnov and Levenes tests for normality and



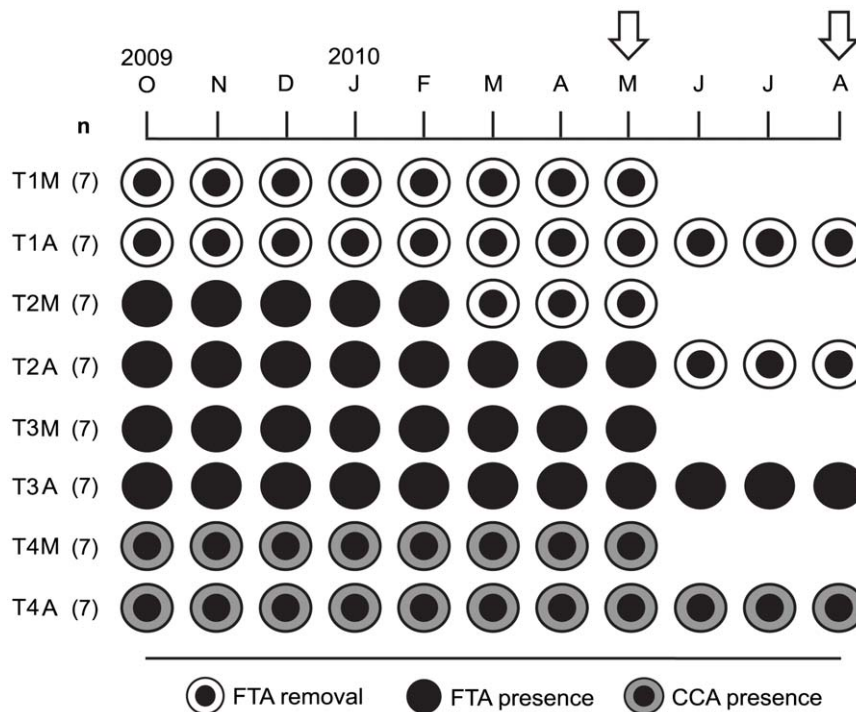

**Figure 2. Graphic representation of the ramets used in the four treatments.** Treatments included *Montastraea annularis* ramets with monthly/fortnightly removal of filamentous turf algae (FTA) surrounding the coral tissue (FTA removal), ramets with FTA in contact with the coral tissue (FTA presence), and ramets with crustose coralline algae (CCA) in contact with the coral tissue (CCA presence). Ramets were collected in May 2010 and August 2010 (arrows) at the beginning and the end of the *M. annularis* gametogenesis cycle. Treatments: T1M and T1A=long-term treatment of FTA removal over 7 and 10 months, respectively; T2M and T2A=short-term treatment of FTA removal over 2.5 months in May 2010 and August 2010, respectively; T3M and T3A=control ramets in constant contact with FTA; and T4M and T4A=control ramets in constant contact with CCA. n=7 collected ramets per date per treatment. doi:10.1371/journal.pone.0054810.g002

homogeneity of group variances, respectively. Two-way analysis of variance (ANOVA; factors: treatment and extraction date) and a post hoc test (Tukey's honest significant difference) were performed on untransformed data, with the exception of ZD in which the data were log transformed. Additionally, *a posteriori* power analyses (Several Means, ANOVA, 2-Way) were carried out for all data to compare mean coral responses for both factors. Because the TT samples from T1A were lost, only the data from three treatments (T2–T4) were used to analyze this biological parameter.

## Results

### Beginning Versus End of Gametogenesis in *Montastraea annularis* (Factor: Date)

The mean values of TT and Chl *a* zoox<sup>-1</sup> in the tissue of *M. annularis* were similar at the beginning (May) and the end (August) of the gametogenesis cycle (Table 1). Therefore, the null hypothesis of no time differences for both variables cannot be rejected, but the estimated power of the test was low due to variation in the pattern of responses within treatments. However, ZD and Chl *a* cm<sup>-2</sup> were significantly higher in May than in August, while the MI was lower in May than in August (Table 1). The estimated power of the test was high, providing certainty of a real effect of the factor 'date', as can be observed from a consistent pattern of differences within treatments (Figure 3).

### Presence or Absence of Algae in the Biological Parameters of *Montastraea annularis* (Factor: Treatment)

Ramets permanently surrounded by FTA (T3) showed the lowest mean values of TT and ZD, and high MI compared to T1 and T4 (Table 1, Figure 3). Interaction terms showed that lower values of TT were found at both sampling dates, as well as higher values of MI in T3M than in T2M (Table 1). When the ramets were consistently surrounded by CCA (T4), the Chl *a* (Chl *a* zoox<sup>-1</sup> and Chl *a* cm<sup>-2</sup>) and TT were the highest and the MI was one of the lowest compared to the other treatments. The ramets surrounded by FTA and CCA had opposite responses in terms of TT, MI, ZD and Chl *a* cm<sup>-2</sup> (Figure 3, Table 1). The ramets surrounded by CCA and those with FTA removal for long (T1) and/or short (T2) periods had similar values of ZD and MI. However, different values between these treatments were found for TT (although interaction terms showed equal values in May) and both measurements of Chl *a* (Figure 3, Table 1).

### Long Versus Short Periods of Algal Removal on *Montastraea annularis*

The mean values of ZD, MI, Chl *a* zoox<sup>-1</sup> and Chl *a* cm<sup>-2</sup> from the tissues of the *M. annularis* ramets (Figure 3) were not significantly different ( $P>0.17$ , Tukey HSD; data not shown) between the long- and short-periods of algal removal. Thus, the effects were equivalent in the ramets following FTA removal for 7 to 10 months (T1) and 2.5 months (T2). This comparison was not possible for the TT in T1 due to loss of material.

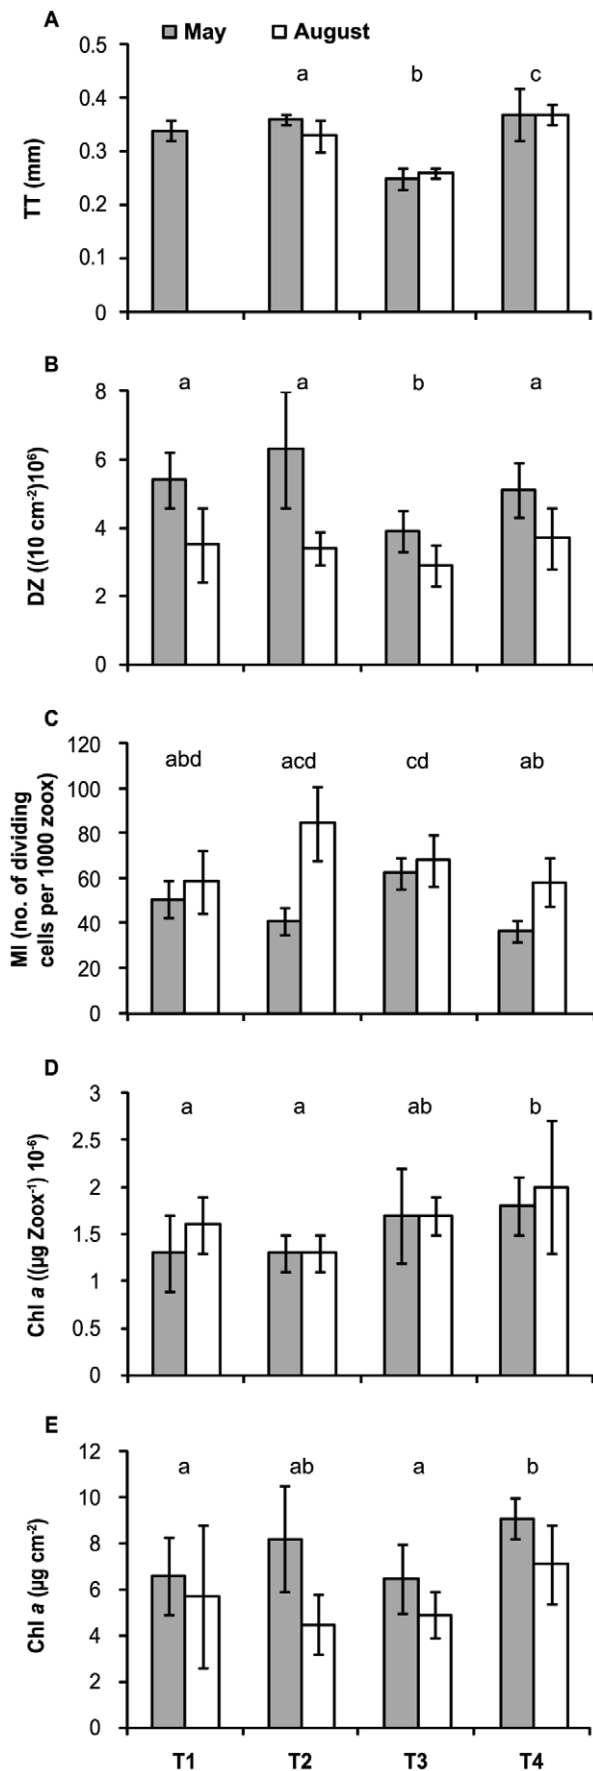

**Figure 3. Biological parameters of *Montastraea annularis* per date per treatment.** Mean values  $\pm$  S.D. of A) tissue thickness (TT), B) zooxanthellae density (ZD), C) mitotic index (MI), D) chlorophyll a (Chl a) zooxanthellae $^{-1}$  (Chl a zoox $^{-1}$ ) and E) Chl a cm $^{-2}$ , per date (May and August) per treatment (T1–T4). Treatments: T1 = ramets with long-term removal of filamentous turf algae (FTA), T2 = ramets with short-term removal of FTA, T3 = control ramets with FTA in permanent contact with the coral tissue, and T4 = control ramets with crustose coralline algae in permanent contact with the coral tissue. Lower-case letters (a–d) above each pair of bars indicate treatments (combining both date values) that were significantly different from one another ( $\alpha = 0.05$ ). T1 of TT was not included in the analysis.  
doi:10.1371/journal.pone.0054810.g003

## Discussion

As hypothesized, the removal of FTA from *M. annularis* reduced the stress on the coral, as indicated by increased TT and ZD in comparison to the control ramets surrounded by FTA. The increase in TT of ramets of *M. annularis* with FTA removal was similar in corals with the absence (in comparison to the application) of stressors like sedimentation, White syndrome, bleaching, turbidity and light attenuation [47–49]. The increase in ZD in ramets with FTA removal was also similar to measurements of this biological parameter in corals with the absence of stressors like low seawater temperature regimes, exposure to cyanide, sedimentation and Pink-line syndrome [26,50–52]. Moreover, TT of corals has been suggested as a high-priority bioindicator for long- and short-term environmental chronic effects on corals [48], and the loss of zooxanthellae has been proposed as an indicator of stress in corals [53]. Lower values of MI were also found in ramets with FTA removal (T1), which is a condition similar to that shown in corals without application of stressors like exposure to cyanide, bleaching, elevated temperatures and Pink-line syndrome [50,52,54,55].

Other member of the *M. annularis* species complex (*M. faveolata*) from our study area, with similar form and species composition of surrounding FTA, was stressed by competition for space with FTA [24], which reduced TT and ZD. In our study, the removal of FTA from *M. annularis* reduced the stress caused by the presence of FTA, increasing TT and ZD. The stress on *M. faveolata* caused by the presence of FTA also reduced the Chl a cm $^{-2}$  in its tissue [24]. However, the removal of FTA from *M. annularis* did not induce an increase in Chl a cm $^{-2}$ , as expected, since this is a response of corals with absence of stressors like sedimentation, low seawater temperature regimes and bleaching [26,51,54]. The lack of consistency in Chl a cm $^{-2}$  results of both studies ([24] and this study) is attributed to the difference of methods used in both studies (manual FTA removal vs. reciprocal transplants of live and death colonies covered with FTA), particular conditions of study sites (Xahuayxol vs. Xcalak) and the *Montastraea* coral species under study (*M. annularis* vs. *M. faveolata*).

The positive responses of *M. annularis* to the removal of FTA, by increasing TT and ZD as well as reducing MI, are similar to other studies reporting beneficial coral responses to the removal of different functional groups of algae at different scales of space and time. Thus, the removal of macroalgae every 1.5–2.0 months for 2 years from patch reefs almost doubled the coverage, growth, and fecundity of *Acropora* spp. [28], while the removal (every 2–3 months for 6 months) of ~2 cm of the brown algae *Lobophora variegata* from the basal tissue of *Porites cylindrica* noticeably diminished tissue mortality [30]. In addition, the removal (every 2 weeks for 2.5 months) of algal turfs and macroalgae surrounding *Porites astreoides* juveniles more than doubled the growth of the control colonies [27], and the clearance of macroalgae every 2 weeks for 3 months from the basal periphery increased the

**Table 1.** Two-way analyses of variance evaluating the effects of sampling date and experimental treatment on biological parameters of *Montastraea annularis* ramets.

| Source                                | df | MS       | F      | p    | Conclusion (Tukey's test)                                             |
|---------------------------------------|----|----------|--------|------|-----------------------------------------------------------------------|
| <b>Tissue thickness</b>               |    |          |        |      |                                                                       |
| Date                                  | 1  | 0.000    | 1.31   | 0.26 | ns                                                                    |
| Treatment                             | 2  | 0.051    | 165.37 | 0.00 | T3 < T2 < T4                                                          |
| Date X Treatment                      | 2  | 0.002    | 5.73   | 0.01 | Significant (T3M < T2M, T4M; T3A < T2A < T4A and T2M > T2A)           |
| <b>Zooxanthellae density</b>          |    |          |        |      |                                                                       |
| Date                                  | 1  | 0.466    | 62.16  | 0.00 | May > August                                                          |
| Treatment                             | 3  | 0.052    | 6.93   | 0.00 | T3 < T1, T2, T4                                                       |
| Date X Treatment                      | 3  | 0.013    | 1.67   | 0.19 | ns                                                                    |
| <b>Mitotic index</b>                  |    |          |        |      |                                                                       |
| Date                                  | 1  | 5490.540 | 49.54  | 0.00 | May < August                                                          |
| Treatment                             | 3  | 932.754  | 8.42   | 0.00 | T3 > T1, T4 and T4 < T2, T3                                           |
| Date X Treatment                      | 3  | 1060.445 | 9.57   | 0.00 | Significant (T3M > T2M, T4M; T2A > T1A, T4A; T2M < T2A and T4M < T4A) |
| <b>Chl <i>a</i> Zoox<sup>-1</sup></b> |    |          |        |      |                                                                       |
| Date                                  | 1  | 2.23E-13 | 1.39   | 0.24 | ns                                                                    |
| Treatment                             | 3  | 1.08E-12 | 6.74   | 0.00 | T4 > T1, T2                                                           |
| Date X Treatment                      | 3  | 9.61E-14 | 0.60   | 0.62 | ns                                                                    |
| <b>Chl <i>a</i> cm<sup>-2</sup></b>   |    |          |        |      |                                                                       |
| Date                                  | 1  | 59.949   | 18.22  | 0.00 | May > August                                                          |
| Treatment                             | 3  | 15.217   | 4.62   | 0.01 | T4 > T1, T3                                                           |
| Date X Treatment                      | 3  | 5.440    | 1.65   | 0.19 | ns                                                                    |

ns = not significant. Treatments are described in Figure 2.  
doi:10.1371/journal.pone.0054810.t001

fecundity of *M. annularis* [21]. Finally, scrapping turf and fleshy macroalgae for 10–12 days from the edge of *M. annularis* tissue restored hyperoxia [17]. Nonetheless, two studies [28,29] reported that some coral species did not display positive responses (in terms of coverage, growth, fecundity and mortality) to the removal of algae.

The reduction of stress on *M. annularis* with FTA removal during 2.5 or 7–10 months was similar, contrary to our hypothesis. We expected less stressed ramets under long- vs. short-periods of FTA removal. It is possible that the reduction of coral stress due to FTA removal, measurable in terms of the biological parameters that we evaluated, happens within 2.5 months of removal, and our later stress evaluation (i.e., 7–10 months) would be similar to the first (i.e., 2.5 months). For example, *M. annularis* restored hyperoxia in the tissue after 10–12 days of turf algae removal, but the recovery was not statistically significant for ramets bordered by algae [17]. Thus, the first detectable reduction of stress on *M. annularis*, for the biological parameters with which we evaluated stress, probably occurs between 0.5 and 2.5 months of FTA removal.

Ramets of *M. annularis* surrounded by CCA showed less stress in comparison with ramets surrounded by FTA, with higher TT, Chl *a* cm<sup>-2</sup> and ZD, and lower MI values. However, low stress of ramets surrounded by CCA and those with both periods of FTA removal was exhibited only in terms of ZD, while TT was similar to that in ramets with short-periods of algal removal, and MI similar to long periods of algal removal. Thus, those results support in part our hypothesis that ramets with CCA and FTA removal would have lower stress when compared with ramets surrounded by FTA. Certainly, our study confirms positive coral responses to the presence of CCA compared to stressful effects of

FTA around the coral tissue. For example, CCA bordering coral tissue did not appear to be antagonistic and did not cause tissue disruption to the corals as opposed to FTA, which has been shown to increase exposure of corals to potential pathogens and virulent genes and to cause coral tissue disruption [13,17]. Also, a lower rate of coral photosynthesis in CCA-coral than in FTA-coral interfaces has been predicted [18]. The reduction of coral stress observed in interactions with CCA (in comparison with other functional algal groups, such as FTA or macroalgae [21,30,56]) is an additional benefit of CCA on coral reefs. It is generally recognized that CCA contribute to coral recruitment, solidification of the reef framework and prevention of bioerosion of the coral substratum [15,57,58]. Even more, the abundance of coral-CCA interactions has been positively correlated with coral cover [17], and atolls in pristine condition are dominated by reef-building stony corals and CCA with abundant coral recruits [59].

Ramets of *M. annularis* surrounded by FTA were the most stressed, responding in an opposite manner to those bordered by CCA, with the lowest TT, ZD and Chl *a* cm<sup>-2</sup>, and the highest MI. These results contrast with other studies [9,60–62] that have shown minor or no effects of mixed turf algae on corals. However, our results are supported by similar findings observed in other reefs of the world [17,18], including colonies of the *M. annularis* species complex [13,24,63,64]. This study was not designed to identify the mechanisms by which FTA stress *M. annularis*, although we tried to separate the stress caused by the presence of FTA and sediments. However, from other studies it can be concluded that several mechanisms associated with FTA are involved in ramet stress of *M. annularis*: 1) FTA can directly overgrow coral tissue by extending their prostrated axes (Figure 1F;

[63]), perhaps involving allelochemical effects [9]. 2) Algal filaments overgrowing corals can trap mucus from the coral and later, sediment (Figure 1F), apparently increasing the damage to the underlying tissues [9]. 3) Unattached FTA cushions projecting above the coral probably stress the coral tissue beneath the algae due to shading [24]. 4) FTA competing with corals may facilitate the invasion by virulent bacteria that compromise coral tissue [17]. 5) Cyanobacteria, such as *Dichothrix* spp. and *Lyngbya* spp., are found intermixed in the FTA [18,65,66] and may cause some degree of stress to the coral by allelopathy. *Lyngbya* spp. can cause severe damage to live coral tissue [20] and inhibit the recruitment of coral larvae [67]. 6) The sediments trapped in the species consortium of FTA attached to the periphery of the coral tissue may stress and kill coral through smothering and tissue burial [24,41,63,64].

*Montastraea annularis* ramet stress increased at the end (August) in comparison to the beginning (May) of gametogenesis, with lower values of ZD and Chl *a*  $\text{cm}^{-2}$ , and higher values of MI, as expected. *M. faveolata* has a similar reproductive cycle as *M. annularis* [68] and, in a reef close to our study site, also showed lower values of Chl *a*  $\text{cm}^{-2}$  and higher values MI in August than in May [24]. However, it has been speculated that lower values of ZD, Chl *a*  $\text{cm}^{-2}$  and Chl *a*  $\text{zoox}^{-1}$ , occurring during summer-fall, are driven by seasonal changes in light and elevated temperature of seawater, and it was hypothesized that all tropical reef-building corals would exhibit that pattern [69]. Nonetheless, the hypothesized universal pattern is not shown within the species of the *M. annularis* complex and other species included in the study where the hypothesis emerged [69]. For example, and contrary to the assumed pattern, *M. faveolata* from our study area had high values of ZD and Chl *a*  $\text{zoox}^{-1}$  in summer [24], while in a second study [70] both *M. annularis* and *M. faveolata* showed similar values of ZD in both summer and winter. Additionally, mean monthly sea surface temperatures (SST) over four years (2006–2009) from a nearby site (18° 30' N, 87° 30' W) ranged from 26.9°C to 29.6°C in May and from 28.5°C to 29.9°C in August (data provided by M. Eakin, NOAA). This relatively small range of SST between dates possibly tampered the stressing effects of temperature increments on the biological parameters of *M. annularis* we measured in August. Since the three *Montastraea* and the two *Acropora* species involved in [69] spawn in summer [32,68,71], the possible coral stress caused by reproduction and that caused by increasing SST cannot be distinguished. When stress caused by wounds and reproduction occur concurrently, corals divert more energy into reproduction [35], healing injuries, or both attributes at the same time with allocation of insufficient energy to either attribute [36]. Our experimental design cannot discriminate between environmental and reproductive factors (if they exist) to explain the differences in the biological parameters at the end of

the reproductive cycle of *M. annularis*. However, it has been predicted that corals with metabolic imbalances under low stress levels and maximizing reproduction would tend to reduce the chlorophyll concentration and biomass of zooxanthellae [72], as we observed at the end of the *M. annularis* gametogenesis cycle.

In summary, our experimental results indicate that the removal of FTA reduced the stress in *M. annularis*. However, there was no difference in this reduction between long- and short-term FTA removal, probably because measurable stress caused by the presence of FTA in terms of the biological parameters we evaluated occurs before 2.5 months and responses beyond that period make no difference in terms of stress of *M. annularis* tissue. The reduction of coral stress was more evident when the ramets were surrounded by CCA, adding a positive coral response to the beneficial roles of this functional algal group to coral reefs. Our results could not distinguish differences in coral stress at the beginning and end of the coral reproductive cycle. Ramets surrounded by FTA were the most stressed ones, confirming the deleterious effects that this functional algal group exerts on corals from the Caribbean [17,24] and other reefs from around the world [9,73]. Certainly, in the Caribbean, the turf algal group is more abundant than other groups, such as macroalgae and CCA [39]. At first, turf algae stress members of the *M. annularis* species complex ([24] and this study), later overgrowing and killing its tissue [24]. The permanent presence of FTA constitutes a chronic source of stress for the *M. annularis* species complex, one of the most important reef-building species in the wider Caribbean [74], which provides high structural complexity to reef communities [33,75,76]. Serious declines of *M. annularis* cover (50–72%) have been reported from Caribbean sites [37,77] in one decade, and further decline is expected if the predominant contact of their tissue with FTA and macroalgae do not change in the near future.

## Acknowledgments

We thank the staff at Parque Nacional Arrecifes de Xcalak for providing facilities; H. Bahena-Basave for taking most of the photos for this study; J.A. Batún Catzín, R. Herrera-Pavón and D.I. de la Cruz-Gaitán for their field assistance; A. Zavala-Mendoza and A.U. Beltrán-Torres for laboratory training; D.I. de la Cruz-Gaitán for assistance in the laboratory; Mark Eakin (NOAA) for providing the temperature data of the EU-funded FORCE Project; and P. Ramsay for correcting the English. Special thanks to the academic editor, S.C.A. Ferse, and two anonymous reviewers for their valuable comments that greatly improved the final version of the manuscript.

## Author Contributions

Conceived and designed the experiments: NPCN JEA. Performed the experiments: NPCN JEA. Analyzed the data: NPCN JEA HAH. Wrote the paper: NPCN JEA JPCG HAH.

## References

- Hughes TP (1994) Catastrophes, phase shifts, and large-scale degradation of a Caribbean coral reef. *Science* 265: 1547–1551.
- Hoegh-Guldberg O, Mumby PJ, Hooten AJ, Steneck RS, Greenfield P, et al. (2007) Coral reefs under rapid climate change and ocean acidification. *Science* 318: 1737–1742.
- Gardner TA, Côté IM, Gill JA, Grant A, Watkinson AR (2003) Long-term region-wide declines in Caribbean corals. *Science* 301: 958–960.
- Pandolfi JM, Bradbury RH, Sala E, Hughes TP, Björndal KA, et al. (2003) Global trajectories of the long-term decline of coral reef ecosystems. *Science* 301: 955–958.
- Riegl B, Bruckner A, Coles SL, Renaud P, Dodge RE (2009) Coral reefs. Threats and conservation in an era of global change. *Ann NY Acad Sci* 1162: 136–186.
- Lirman D (2001) Competition between macroalgae and corals: effects of herbivore exclusion and increased algal biomass on coral survivorship and growth. *Coral Reefs* 19: 392–399.
- Rasher DB, Hay ME (2010) Chemically rich seaweeds poison corals when not controlled by herbivores. *Proc Natl Acad Sci USA* 107: 9683–9688.
- Chadwick NE, Morrow KM (2011) Competition among sessile organisms on coral reefs. In: Dubinsky Z, Stambler N, editors. *Coral reefs: An ecosystem in transition*. New York: Springer Science+Business Media B. V. pp. 324–350.
- Jompa J, McCook LJ (2003) Coral-algal competition: macroalgae with different properties have different effects on corals. *Mar Ecol Prog Ser* 258: 87–95.
- Nugues MM, Bak RPM (2006) Differential competitive abilities between Caribbean coral species and a brown alga: a year of experiments and a long-term perspective. *Mar Ecol Prog Ser* 315: 75–86.
- Birrell CL, McCook LJ, Willis BL, Diaz-Pulido GA (2008) Effects of benthic algae on the replenishment of corals and the implications for the resilience of coral reefs. *Oceanogr Mar Biol Annu Rev* 46: 25–63.
- Vermeij MJA, Sandin SA (2008) Density-dependent settlement and mortality structure the earliest life phases of a coral population. *Ecology* 89: 1994–2004.

13. Barott K, Smith J, Dinsdale E, Hatay M, Sandin S, et al. (2009) Hyperspectral and physiological analyses of coral-algal interactions. *PLoS ONE* 4(11): e8043.
14. Fong P, Paul VJ (2011) Coral Reef Algae. In: Dubinsky Z, Stambler N, editors. *Coral Reefs: An Ecosystem in Transition*. New York: Springer Science+Business Media B. V. pp. 241–272.
15. Harrington L, Fabricius KE, De'ath G, Negri A (2004) Recognition and selection of settlement substrata determine post-settlement survival in corals. *Ecology* 85: 3428–3437.
16. Smith JE, Shaw M, Edwards RA, Obura D, Pantos O, et al. (2006) Indirect effects of algae on coral: algae-mediated, microbe-induced coral mortality. *Ecol Lett* 9: 835–845.
17. Barott KL, Rodriguez-Mueller B, Youle M, Marhaver KL, Vermeij MJA, et al. (2012) Microbial to reef scale interactions between the reef-building coral *Montastraea annularis* and benthic algae. *Proc R Soc B-Biol Sci*. 279: 1655–1664.
18. Wangpraseurt D, Weber M, Roy H, Polerecky L, de Beer D, et al. (2012) *In situ* oxygen dynamics in coral-algal interactions. *PLoS ONE* 7(2): e31192.
19. Box SJ, Mumby PJ (2007) Effect of macroalgal competition on growth and survival of juvenile Caribbean corals. *Mar Ecol Prog Ser* 342: 139–149.
20. Titlyanov EA, Yakovleva IM, Titlyanova TV (2007) Interaction between benthic algae (*Lyngbya bouillonii*, *Dictyota dichotoma*) and scleractinian coral *Porites lutea* in direct contact. *J Exp Mar Biol Ecol* 342: 282–291.
21. Foster NL, Box SJ, Mumby PJ (2008) Competitive effects of macroalgae on the fecundity of the reef-building coral *Montastraea annularis*. *Mar Ecol Prog Ser* 367: 143–152.
22. Hauri C, Fabricius KE, Schaffelke B, Humphrey C (2010) Chemical and physical environmental conditions underneath mat- and canopy-forming macroalgae, and their effects on understory corals. *PLoS ONE* 5(9): e12685.
23. Vermeij MJA, van Moerselaar I, Engelhard S, Hörmlein C, Vonk SM, et al. (2010) The effects of nutrient enrichment and herbivore abundance on the ability of turf algae to overgrow coral in the Caribbean. *PLoS ONE* 5(12): e14312.
24. Quan-Young LI, Espinoza-Avalos J (2006) Reduction of zooxanthellae density, chlorophyll *a* concentration, and tissue thickness of the coral *Montastraea faveolata* (Scleractinia) when competing with mixed turf algae. *Limnol Oceanogr* 51: 1159–1166.
25. Barnes DJ, Lough JM (1999) *Porites* growth characteristics in a changed environment: Misima Island, Papua New Guinea. *Coral Reefs* 18: 213–218.
26. Philipp E, Fabricius K (2003) Photophysiological stress in scleractinian corals in response to short-term sedimentation. *J Exp Mar Biol Ecol* 287: 57–78.
27. Venera-Ponton DE, Diaz-Pulido G, McCook LJ, Rangel-Campo A (2011) Macroalgae reduce growth of juvenile corals but protect them from parrotfish damage. *Mar Ecol Prog Ser* 421: 109–115.
28. Tanner JE (1995) Competition between scleractinian corals and macroalgae: an experimental investigation of coral growth, survival and reproduction. *J Exp Mar Biol Ecol* 190: 151–168.
29. McClanahan TR, Huntington BE, Cokos B (2011) Coral responses to macroalgal reduction and fisheries closure on Caribbean patch reefs. *Mar Ecol Prog Ser* 437: 89–102.
30. Jompa J, McCook LJ (2002) Effects of competition and herbivory on interactions between a hard coral and a brown alga. *J Exp Mar Biol Ecol* 271: 25–39.
31. Rogers CS, Muller EM, Spitzack A, Miller J (2008) The future of coral reefs in the US Virgin Islands: Is *Acropora palmata* more likely to recover than *Montastraea annularis* complex? *Proc 11<sup>th</sup> Int Coral Reef Symp* 1: 226–230.
32. Edmunds PJ, Ross CLM, Didden C (2011) High, but localized recruitment of *Montastraea annularis* complex in St. John, United States Virgin Islands. *Coral Reefs* 30: 123–130.
33. Szmant AM (1991) Sexual reproduction by the Caribbean reef corals *Montastraea annularis* and *M. cavernosa*. *Mar Ecol Prog Ser* 74: 13–25.
34. Rinkevich B (1996) Do reproduction and regeneration in damaged corals compete for energy allocation? *Mar Ecol Prog Ser* 143: 297–302.
35. Kramarsky-Winter E, Loya Y (2000) Tissue regeneration in the coral *Fungia granulosa*: the effect of extrinsic and intrinsic factors. *Mar Biol* 137: 867–873.
36. Van Veghel MLJ, Bak RPM (1994) Reproductive characteristics of the polymorphic Caribbean reef building coral *Montastraea annularis*. III. Reproduction in damaged and regenerating colonies. *Mar Ecol Prog Ser* 109: 229–233.
37. Okubo N, Motokawa T, Omori M (2007) When fragmented coral spawn? Effect of size and timing on survivorship and fecundity of fragmentation in *Acropora formosa*. *Mar Biol* 151: 353–363.
38. Ruiz-Zarate MA, Hernández-Landa RC, González-Salas C, Nuñez-Lara E, Arias-González E (2003) Condition of coral reef ecosystems in central-southern Quintana Roo, Mexico (Part 1: stony corals and algae). *Atoll Res Bull* 496: 318–337.
39. Kramer PA (2003) Synthesis of coral reef health indicators for the Western Atlantic: Results of the AGRRA program (1997–2000). *Atoll Res Bull* 496: 1–57.
40. Miller J, Muller E, Rogers C, Waara R (2009) Coral disease following massive bleaching in 2005 causes 60% decline in coral cover on reefs in the US Virgin Islands. *Coral Reefs* 28: 925–937.
41. Roy RE (2004) Akumal's reefs: stony coral communities along the developing Mexican Caribbean coastline. *Rev Biol Trop* 52: 869–881.
42. Mumby PJ, Foster NL, Glynn-Fahy EA (2005) Patch dynamics of coral reef macroalgae under chronic and acute disturbance. *Coral Reefs* 24: 681–692.
43. Jorgensen P, Espinoza-Avalos J, Bahena-Basave H (2008) High population density survival of the sea urchin *Diadema antillarum* (Philippi 1845) to a category 5 hurricane in southern Mexican Caribbean. *Hidrobiológica* 18: 257–260.
44. Alvarado JJ, Fernández C, Cortés J (2009) Water quality conditions on coral reefs at the Marino Ballena National Park, Pacific Costa Rica. *Bull Mar Sci* 84: 137–152.
45. Cortés J, Risk MJ (1985) A reef under siltation stress: Cahuita, Costa Rica. *Bull Mar Sci* 36: 339–356.
46. Maina J, McClanahan TR, Venus V, Ateweberhan M, Madin J (2011) Global gradients of coral exposure to environmental stresses and implications for local management. *PLoS ONE* 6: e23064.
47. Andersen SB, Vestergaard ML, Ainsworth TD, Hoegh-Guldberg O, Kühl M (2010) Acute tissue death (white syndrome) affects the microenvironment of tabular *Acropora* corals. *Aquat Biol* 10: 99–104.
48. Cooper TF, Gilmour JP, Fabricius KE (2009) Bioindicators of changes in water quality on coral reefs: Review and recommendations for monitoring programmes. *Coral Reefs* 28: 589–606.
49. Mendes JM, Woodley JD (2002) Effect of the 1995–1996 bleaching event on polyp tissue depth, growth, reproduction and skeletal band formation in *Montastraea annularis*. *Mar Ecol Prog Ser* 235: 93–102.
50. Cervino JM, Hayes RL, Honovich M, Goreau TJ, Jones S, et al. (2003) Changes in zooxanthellae density, morphology, and mitotic index in hermatypic corals and anemones exposed to cyanide. *Mar Poll Bull* 46: 573–586.
51. Kemp DW, Oakley CA, Thornhill DJ, Newcomb LA, Schmidt GW, et al. (2011) Catastrophic mortality on inshore coral reefs of the Florida Keys due to severe low-temperature stress. *Global Change Biol* 17: 3468–3477.
52. Ravindran J, Raghukumar C (2006) Pink-line syndrome, a physiological crisis in the scleractinian coral *Porites lutea*. *Mar Biol* 149: 347–356.
53. Jones RJ (1997) Zooxanthellae loss as a bioassay for assessing stress in corals. *Mar Ecol Prog Ser* 149: 163–171.
54. Harithsa S, Raghukumar C, Dalal SG (2005) Stress response of two coral species in the Kavaratti atoll of the Lakshadweep Archipelago, India. *Coral Reefs* 24: 463–474.
55. Strychar KB, Coates M, Sammarco PW, Piva TJ, Scott PT (2005) Loss of *Symbiodinium* from bleached soft corals *Sarcophyton ehrenbergi*, *Simulium* sp. and *Xenia* sp. *J Exp Mar Biol Ecol* 320: 159–177.
56. McCook LJ, Jompa J, Diaz-Pulido G (2001) Competition between corals and algae on coral reefs: a review of evidence and mechanisms. *Coral Reefs* 19: 400–417.
57. O'Leary JK, McClanahan TR (2010) Trophic cascades result in large-scale coralline algae loss through differential grazer effects. *Ecology* 91: 3584–3597.
58. Vermeij MJA, Dailer ML, Smith CM (2011) Crustose coralline algae can suppress macroalgal growth and recruitment on Hawaiian coral reefs. *Mar Ecol Prog Ser* 422: 1–7.
59. Sandin SA, Smith JE, DeMartini EE, Dinsdale EA, Donner SD, et al. (2008) Baselines and degradation of coral reefs in the Northern Line Islands. *PLoS ONE* 3(2): e1548.
60. Meesters EH, Noordeloos M, Bak RPM (1994) Damage and regeneration: links to growth in the reef-building coral *Montastraea annularis*. *Mar Ecol Prog Ser* 112: 119–128.
61. McCook LJ (2001) Competition between corals and algal turfs along a gradient of terrestrial influence in the nearshore central Great Barrier Reef. *Coral Reefs* 19: 419–425.
62. Titlyanov E, Kiyashko S, Titlyanov T, Yakovleva IM, Wada E (2006) Coral-algal competition as determined from the rates of overgrowth, physiological condition of polyps of the scleractinian coral *Porites lutea*, and structure of algal associations within boundary areas. *Proc 10<sup>th</sup> Int Coral Reef Symp* 1: 1931–1942.
63. Dustan P (1977) Vitality of reef coral populations off Key Largo, Florida: Recruitment and mortality. *Environ Geol* 2: 51–58.
64. Nugues MM, Roberts CM (2003) Coral mortality and interaction with algae in relation to sedimentation. *Coral Reefs* 22: 507–516.
65. Carpenter RC (1981) Grazing by *Diadema antillarum* (Philippi) and its effects on the benthic algal community. *J Mar Res* 39: 749–765.
66. Littler MM, Littler DS, Brooks BL (2006) Harmful algae on tropical coral reefs: Bottom-up eutrophication and top-down herbivory. *Harmful Algae* 5: 565–585.
67. Kuffner IB, Walters LJ, Becerro MA, Paul VJ, Ritson-Williams R, et al. (2006) Inhibition of coral recruitment by macroalgae and cyanobacteria. *Mar Ecol Prog Ser* 323: 107–117.
68. Szmant MA, Weil E, Miller MW, Colón DE (1997) Hybridization within the species complex of the scleractinian coral *Montastraea annularis*. *Mar Biol* 129: 561–572.
69. Fitt WK, McFarland FK, Warner ME, Chilcoat GC (2000) Seasonal patterns of tissue biomass and densities of symbiotic dinoflagellates in reefs corals and relation to coral bleaching. *Limnol Oceanogr* 45: 677–685.
70. Cruz-Piñón G, Carriacart-Ganivet JP, Espinoza-Avalos J (2003) Monthly skeletal extension rates of the hermatypic corals *Montastraea annularis* and *Montastraea faveolata*: biological and environmental controls. *Mar Biol* 143: 491–500.
71. Szmant MA (1986) Reproductive ecology of Caribbean reef corals. *Coral Reefs* 5: 43–54.
72. Obura DO (2009) Reef corals bleach to resist stress. *Mar Poll Bull* 58: 206–212.
73. Jompa J, McCook LJ (2003) Contrasting effects of turf algae on corals: massive *Porites* spp. are unaffected by mixed-species turfs, but killed by the red alga *Antrichium tenue*. *Mar Ecol Prog Ser* 258: 79–86.



74. Weil E, Cr  quer A, Urreiztieta I (2009) Yellow band disease compromises the reproductive output of the Caribbean reef-building coral *Montastraea faveolata* (Anthozoa, Scleractinia). *Dis Aquat Org* 87: 45–55.
75. Alvarez-Filip L, Dulvy NK, Gill JA, C  t   IM, Watkinson AR (2009) Flattening of Caribbean coral reefs: region-wide declines in architectural complexity. *Proc R Soc B-Biol Sci* 276: 3019–3025.
76. Chollett I, Mumby PJ (2012) Predicting the distribution of *Montastraea* reefs using wave exposure. *Coral Reefs* 31: 493–503.
77. Edmunds PJ, Elahi R (2007) The demographics of a 15-year decline in cover of the Caribbean reef coral *Montastraea annularis*. *Ecol Monogr* 77: 3–18.
